# Supplementary material for: Genome-wide identification of oat TCP gene family and expression patterns under abiotic stress
Source: Front Genet. 2025 Feb 4;16:1533562. doi: 10.3389/fgene.2025.1533562 (PMC11832536; doi:10.3389/fgene.2025.1533562)
Supplement: Supplementary file 4 [file Table6.xlsx]

## Sheet: Table S6
Table S6 Cis-acting elements of AsTCP genes in the 'SFS'
elements	sequences	function	classification
ARE	AAACCA	cis-acting regulatory element essential for the anaerobic induction	Stress response
MBS	CAACTG	MYB binding site involved in drought-inducibility	Stress response
TC-rich repeats	GTTTTCTTAC	cis-acting element involved in defense and stress responsiveness	Stress response
MYB	CAACAG		Stress response
CCAAT-box	CAACGG	MYBHv1 binding site	Stress response
MYC	CATGTG		Stress response
MYB recognition site	CCGTTG		Stress response
Myb-binding site	CAACAG		Stress response
MYB-like sequence	TAACCA		Stress response
GC-motif	CCCCCG	enhancer-like element involved in anoxic specific inducibility	Stress response
WRE3	CCACCT		Stress response
DRE1	ACCGAGA		Stress response
DRE core	GCCGAC		Stress response
LTR	CCGAAA	cis-acting element involved in low-temperature responsiveness	Stress response
CGTCA-motif			Hormone response
ABRE3a	TACGTG		Hormone response
ABRE2	TACGTG		Hormone response
ABRE4	TACGTG		Hormone response
ABRE	CACGTG/ACGTG	cis-acting element involved in the abscisic acid responsiveness	Hormone response
AC-I	(T/C)C(T/C)(C/T)ACC(T/C)ACC		Hormone response
AC-II	CCACCAACCCCC		Hormone response
W box	TTGACC		Hormone response
TCA-element	TCAGAAGAGG	cis-acting element involved in salicylic acid responsiveness	Hormone response
as-1	TGACG		Hormone response
ERE	ATTTCATA		Hormone response
P-box	CCTTTTG	gibberellin-responsive element	Hormone response
AuxRR-core	GGTCCAT	cis-acting regulatory element involved in auxin responsiveness	Hormone response
TGACG-motif	TGACG	cis-acting regulatory element involved in the MeJA-responsiveness	Hormone response
TGA-element	AACGAC	auxin-responsive element	Hormone response
TCA	TCATCTTCAT		Hormone response
TATC-box	TATCCCA	cis-acting element involved in gibberellin-responsiveness	Hormone response
GARE-motif	TCTGTTG	gibberellin-responsive element	Hormone response
WUN-motif	AAATTTCCT	wound-responsive element	Hormone response
AE-box	AGAAACAA	part of a module for light response	Light response
Box 4	ATTAAT	part of a conserved DNA module involved in light responsiveness	Light response
G-box	CACGTG/CACGTC/CACGTT/CACGAC	cis-acting regulatory element involved in light responsiveness	Light response
GATA-motif	GATAGGG/GATAGGA	part of a light responsive element	Light response
I-box	CCTTATCCCT	part of a light responsive element	Light response
MRE	AACCTAA	MYB binding site involved in light responsiveness	Light response
GT1-motif	GGTTAA/GGTTAAT	light responsive element	Light response
TCCC-motif	TCTCCCT	part of a light responsive element	Light response
TCT-motif	TCTTAC	part of a light responsive element	Light response
ACE	ACGTA	cis-acting element involved in light responsiveness	Light response
Sp1	GGGCGG	light responsive element	Light response
LAMP-element	CTTTATCA	part of a light responsive element	Light response
A-box	CCGTCC	cis-acting regulatory element/sequence conserved in alpha-amylase promoters	Light response
O2-site	GATGA(C/T)(A/G)TG(A/G)	cis-acting regulatory element involved in zein metabolism regulation	physiological response
CAT-box	GCCACT	cis-acting regulatory element related to meristem expression	physiological response
MSA-like	(T/C)C(T/C)AACGG(T/C)(T/C)A	cis-acting element involved in cell cycle regulation	physiological response
RY-element	CATGCATG	cis-acting regulatory element involved in seed-specific regulation	physiological response
CCGTCC motif	CCGTCC		physiological response
